# Supplementary material
Source: PubMed Central journal article supplement (PMC5981083)
Supplement: AEM.00406-18_zam012188547s1.pdf [file AEM.00406-18_zam012188547s1.pdf]

**FIG S1** (Watanabe *et al.*)

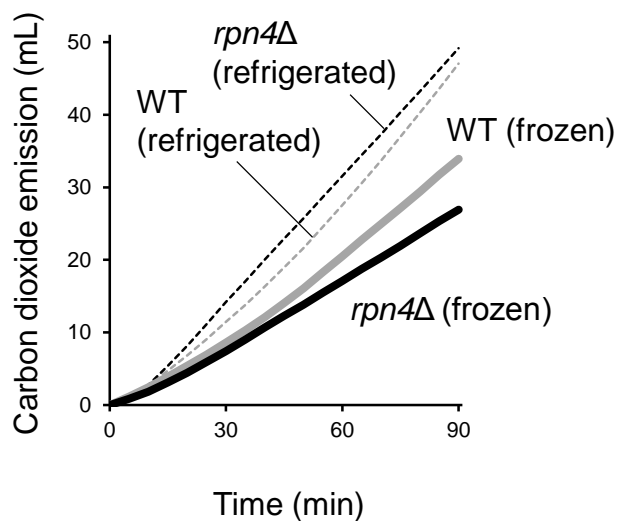

**FIG S1** Role of Rpn4p on model dough fermentation after refrigerating or freezing preservation. The graph indicates the total carbon dioxide emission during the model dough fermentation tests using the BY4741 wild-type strain after refrigerating preservation (grey, broken line) or freezing preservation (grey, bold line) or the *rpn4Δ* strain after refrigerating preservation (black, broken line) or freezing preservation (black, bold line). The data shown are the averaged data of two or three independent experiments using refrigerated or frozen cells. WT, wild type.
